# Supplementary material for: Differences in Alpha Diversity of Gut Microbiota in Neurological Diseases
Source: PubMed Central journal article supplement (PMC9274120; doi:10.3389/fnins.2022.879318), 2022-06-28
Supplement: Image_1.pdf [file Image_1.pdf]

## Supplementary Material

### 2 Supplementary Figures

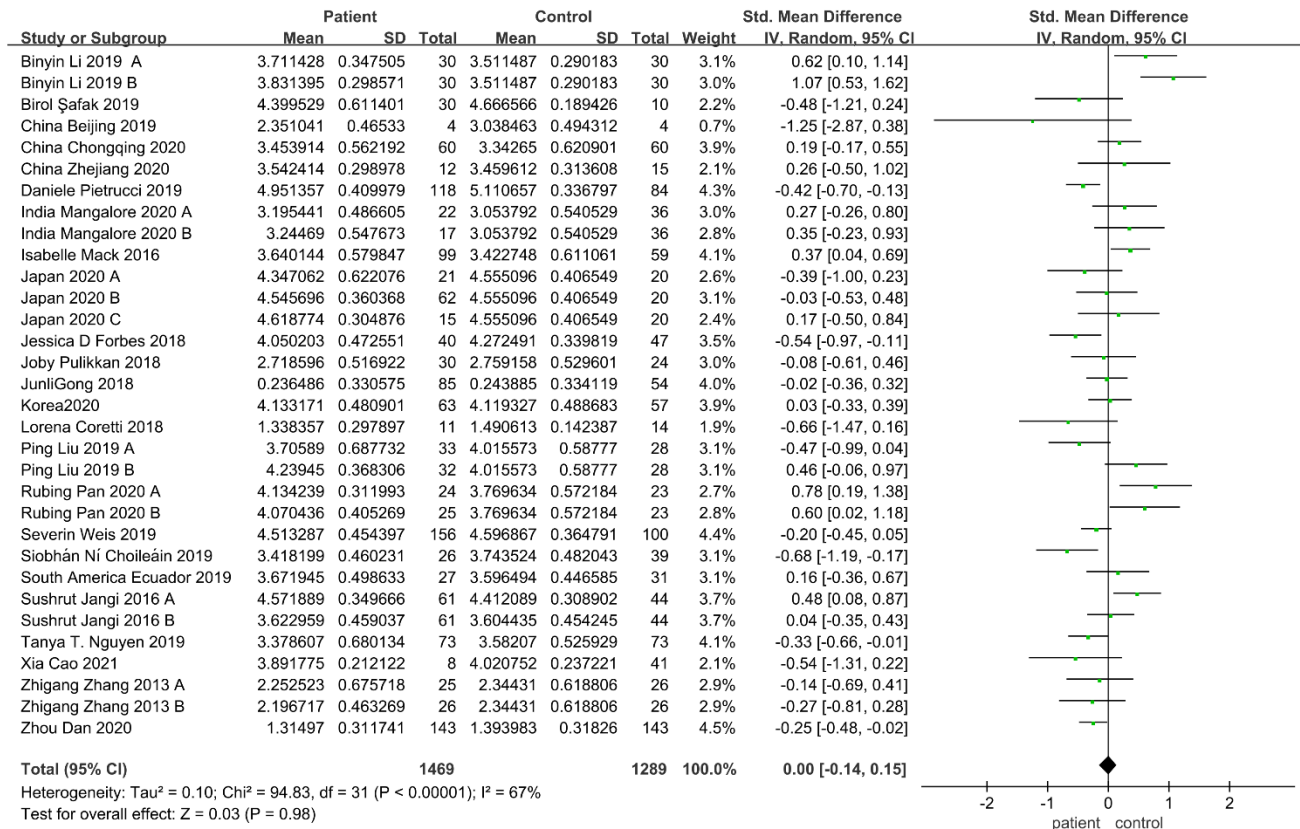

**Supplementary Figure 1. Forest plots of alpha diversity in the gut microbiome of patients with neurological diseases compared with healthy controls.** Abbreviations: SMD, standardized mean difference; SD, standard deviation.

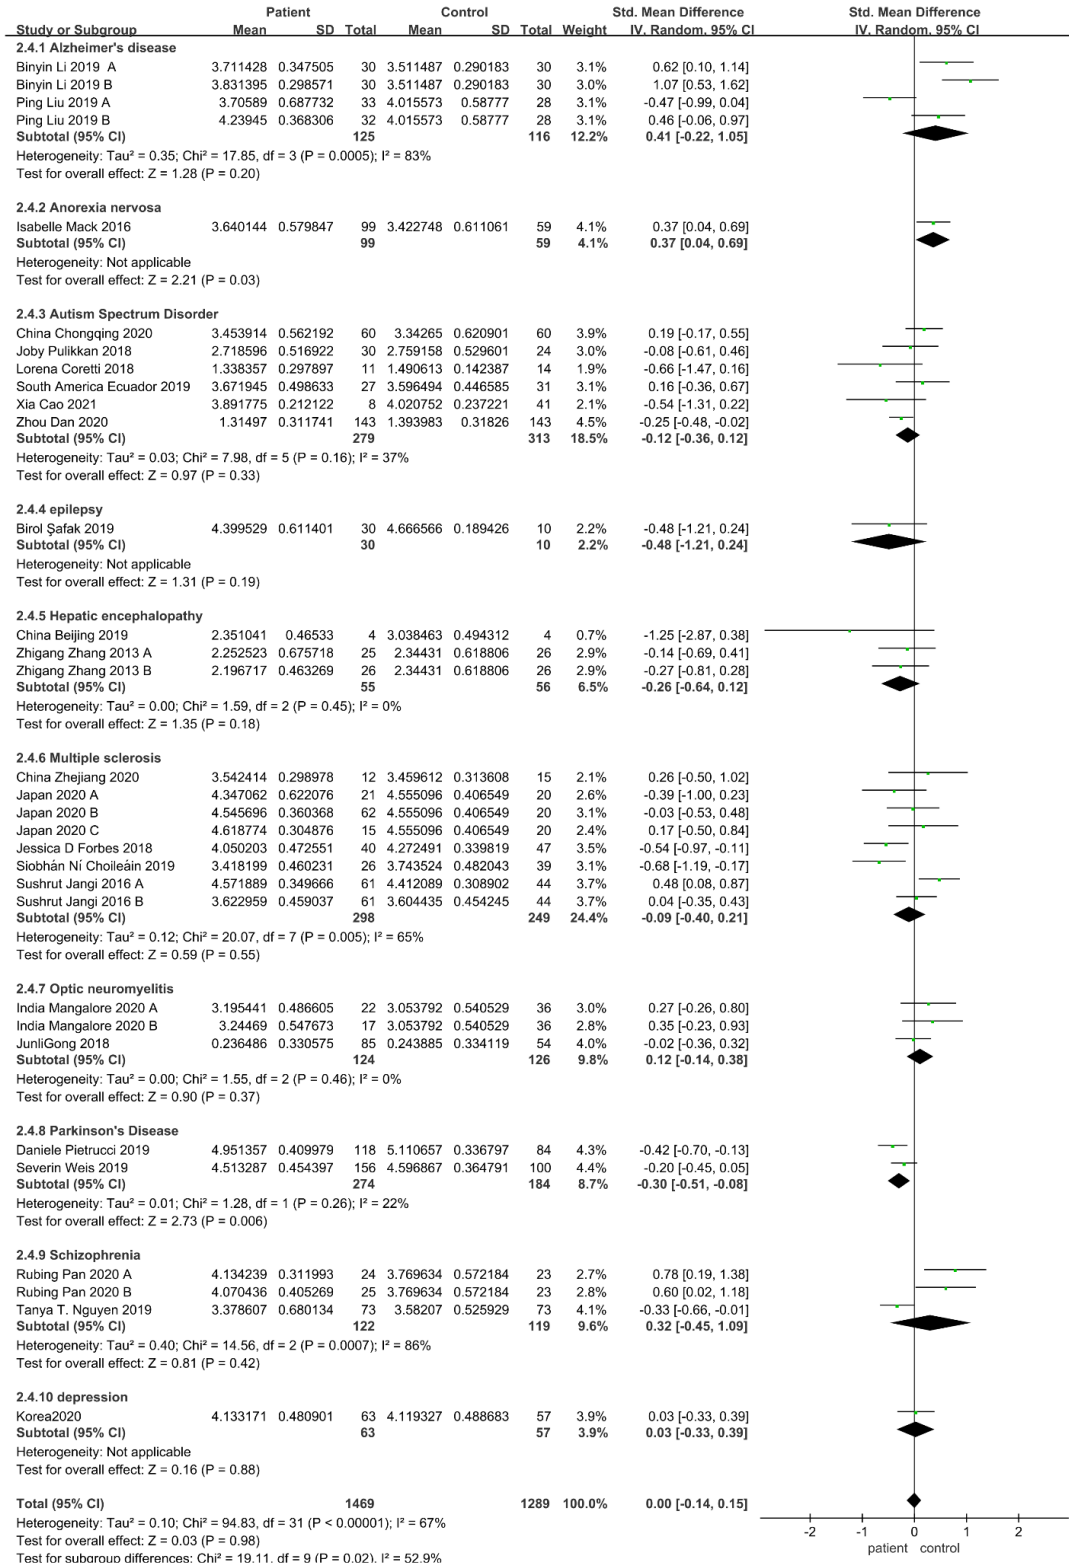

Supplementary Figure 2. Forest plot of the Shannon for the diseases. Abbreviations: SMD, standardized mean difference; SD, standard deviation.

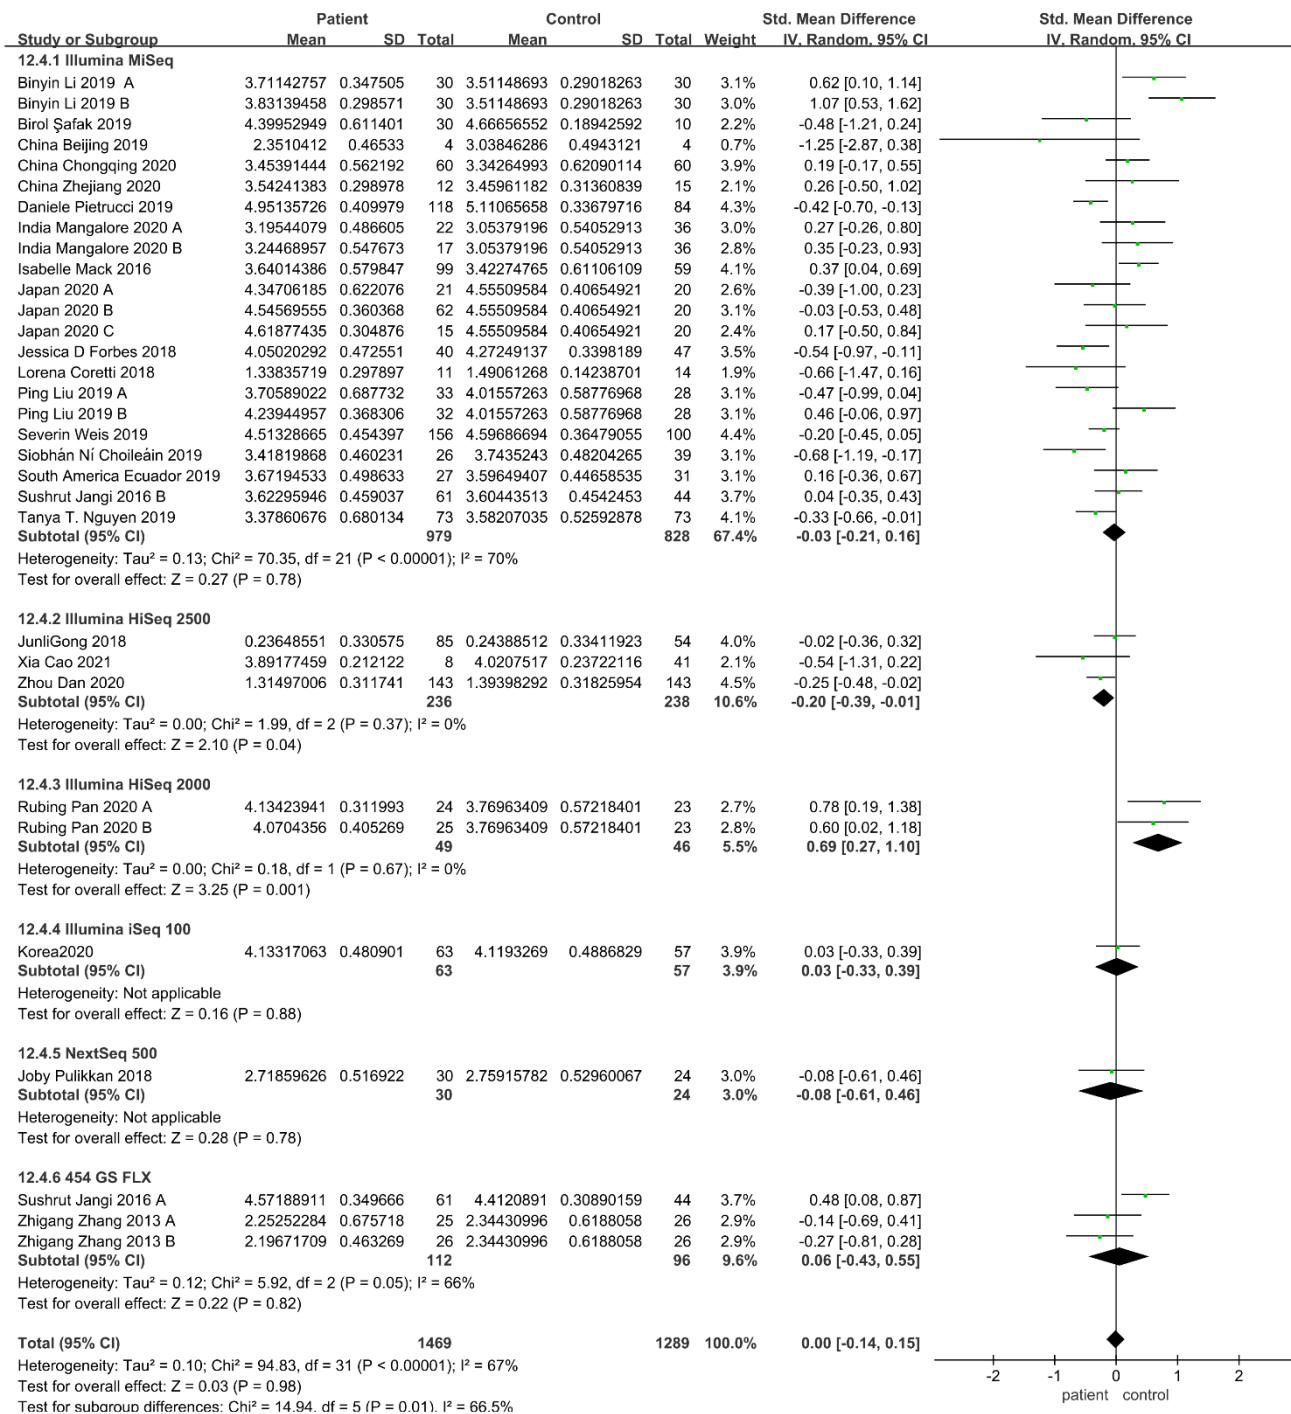

**Supplementary Figure 3. Forest plot of the Shannon for the sequencing instrument.**

Abbreviations: SMD, standardized mean difference; SD, standard deviation.

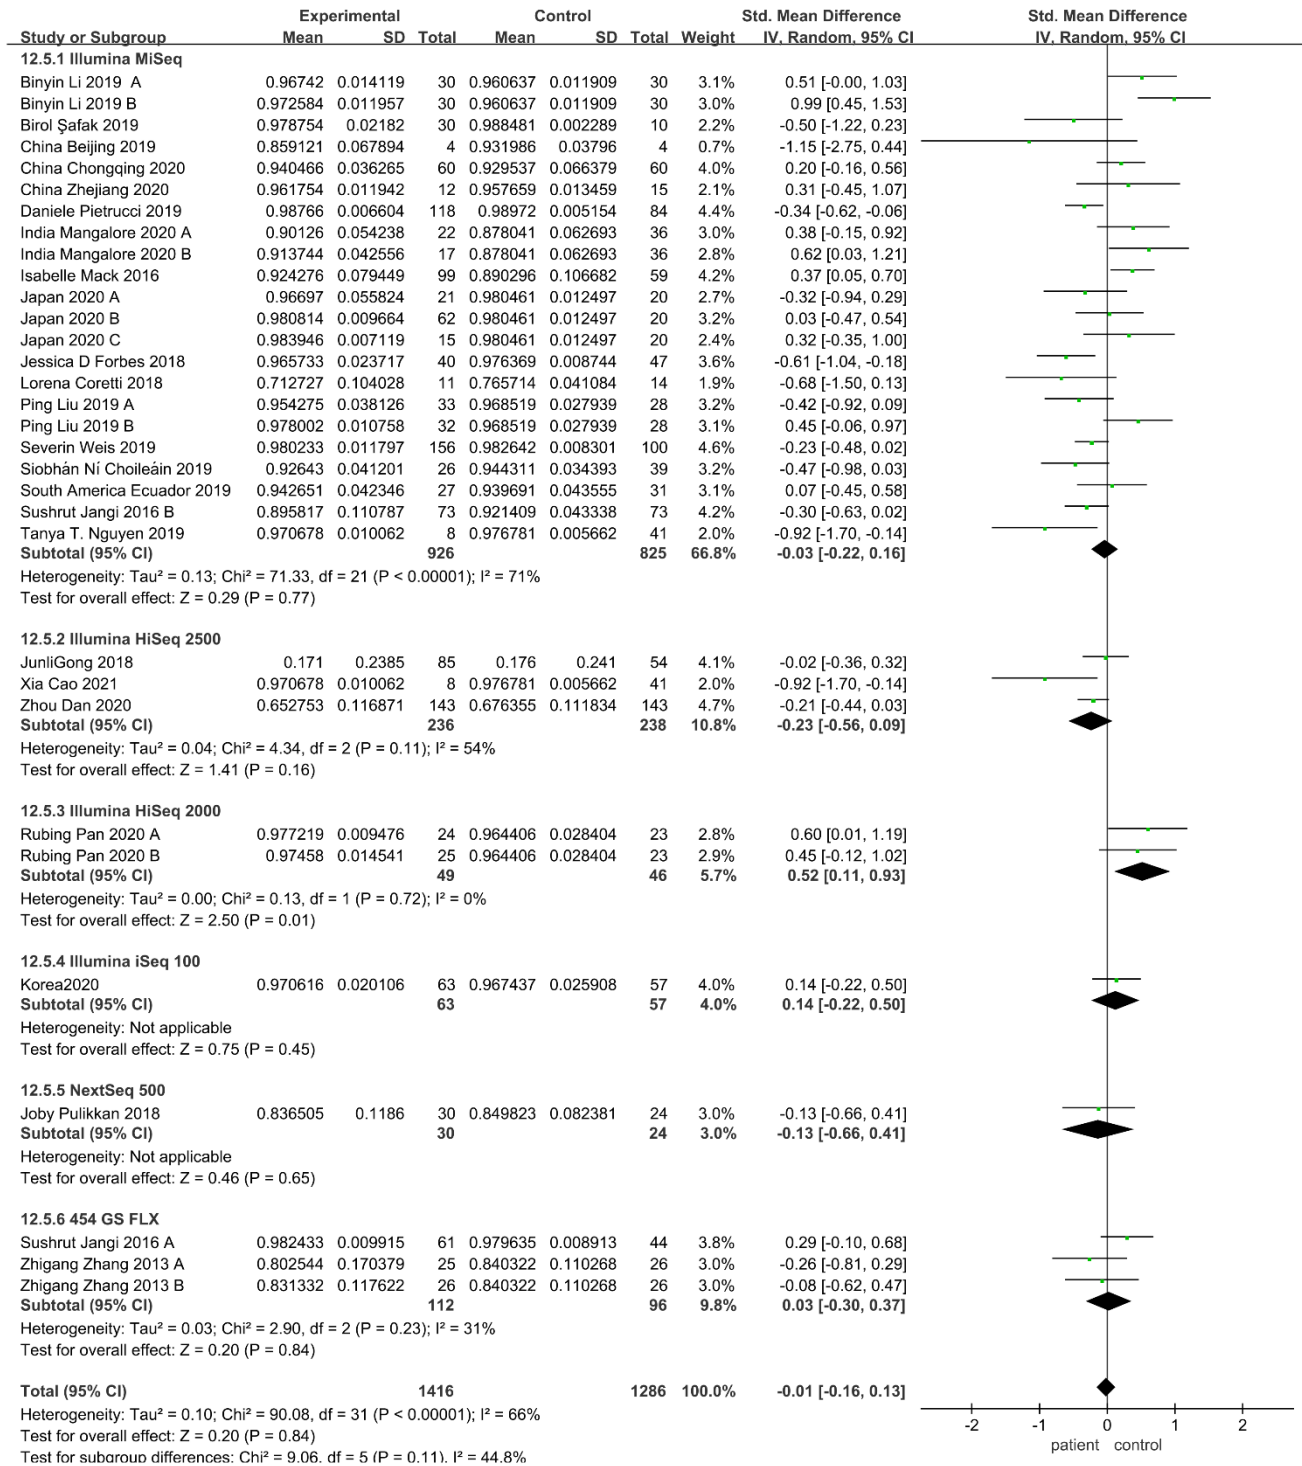

**Supplementary Figure 4. Forest plot of the Simpson for the sequencing instrument.**  
Abbreviations: SMD, standardized mean difference; SD, standard deviation.

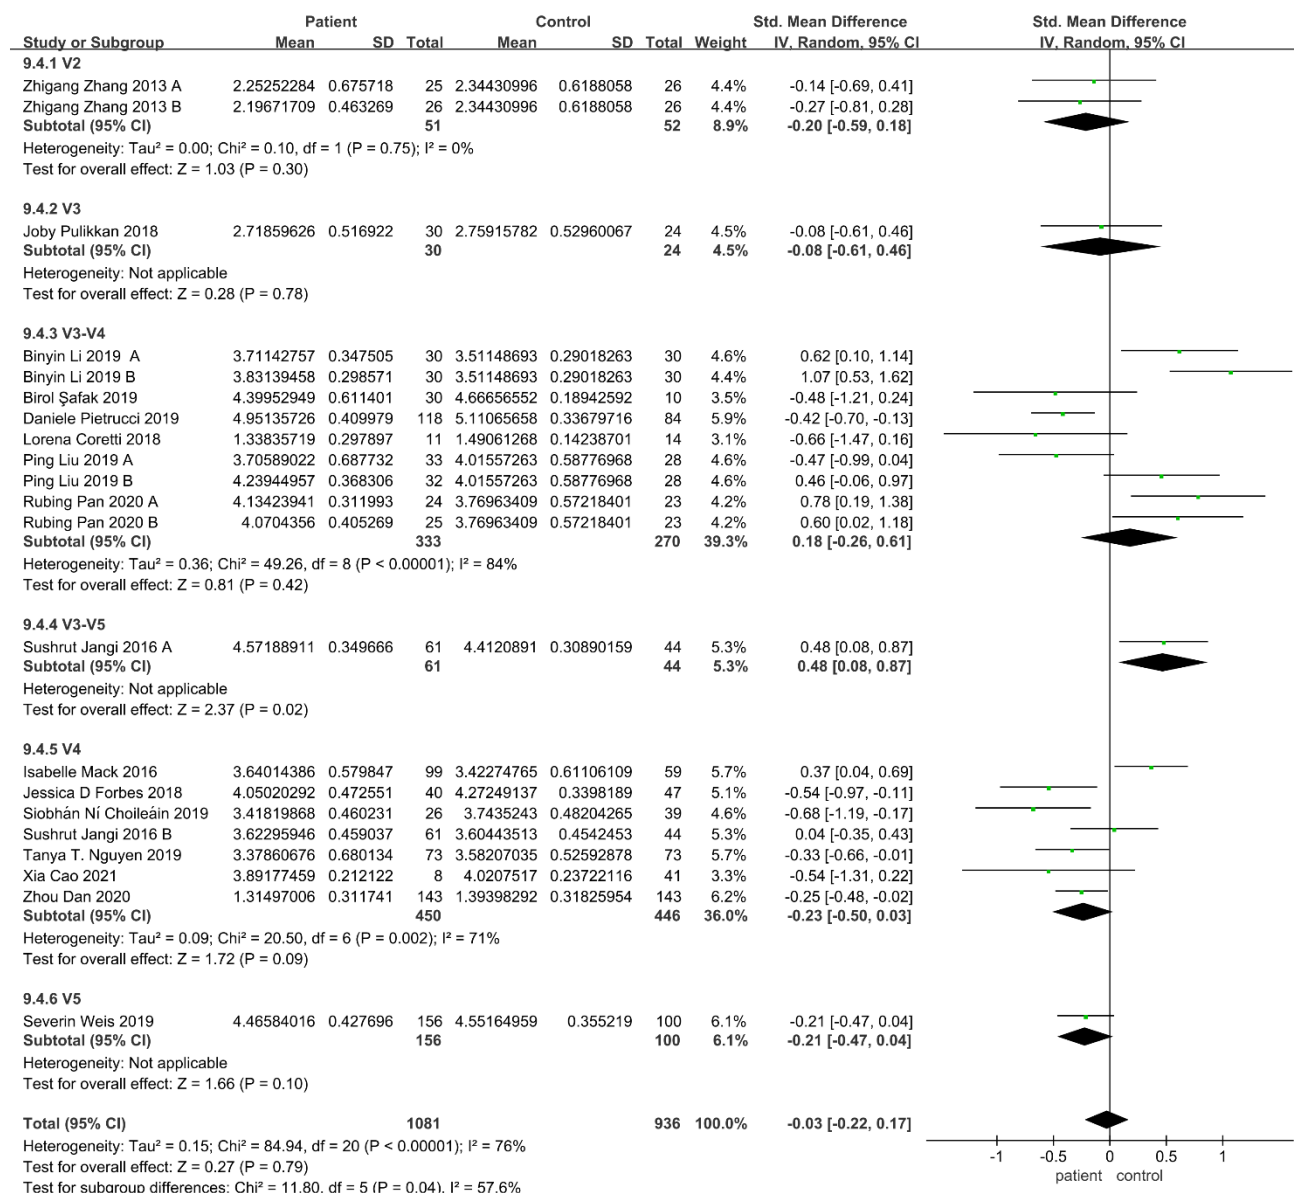

**Supplementary Figure 5. Forest plot of the Shannon for the sequencing region.** Abbreviations: SMD, standardized mean difference; SD, standard deviation.

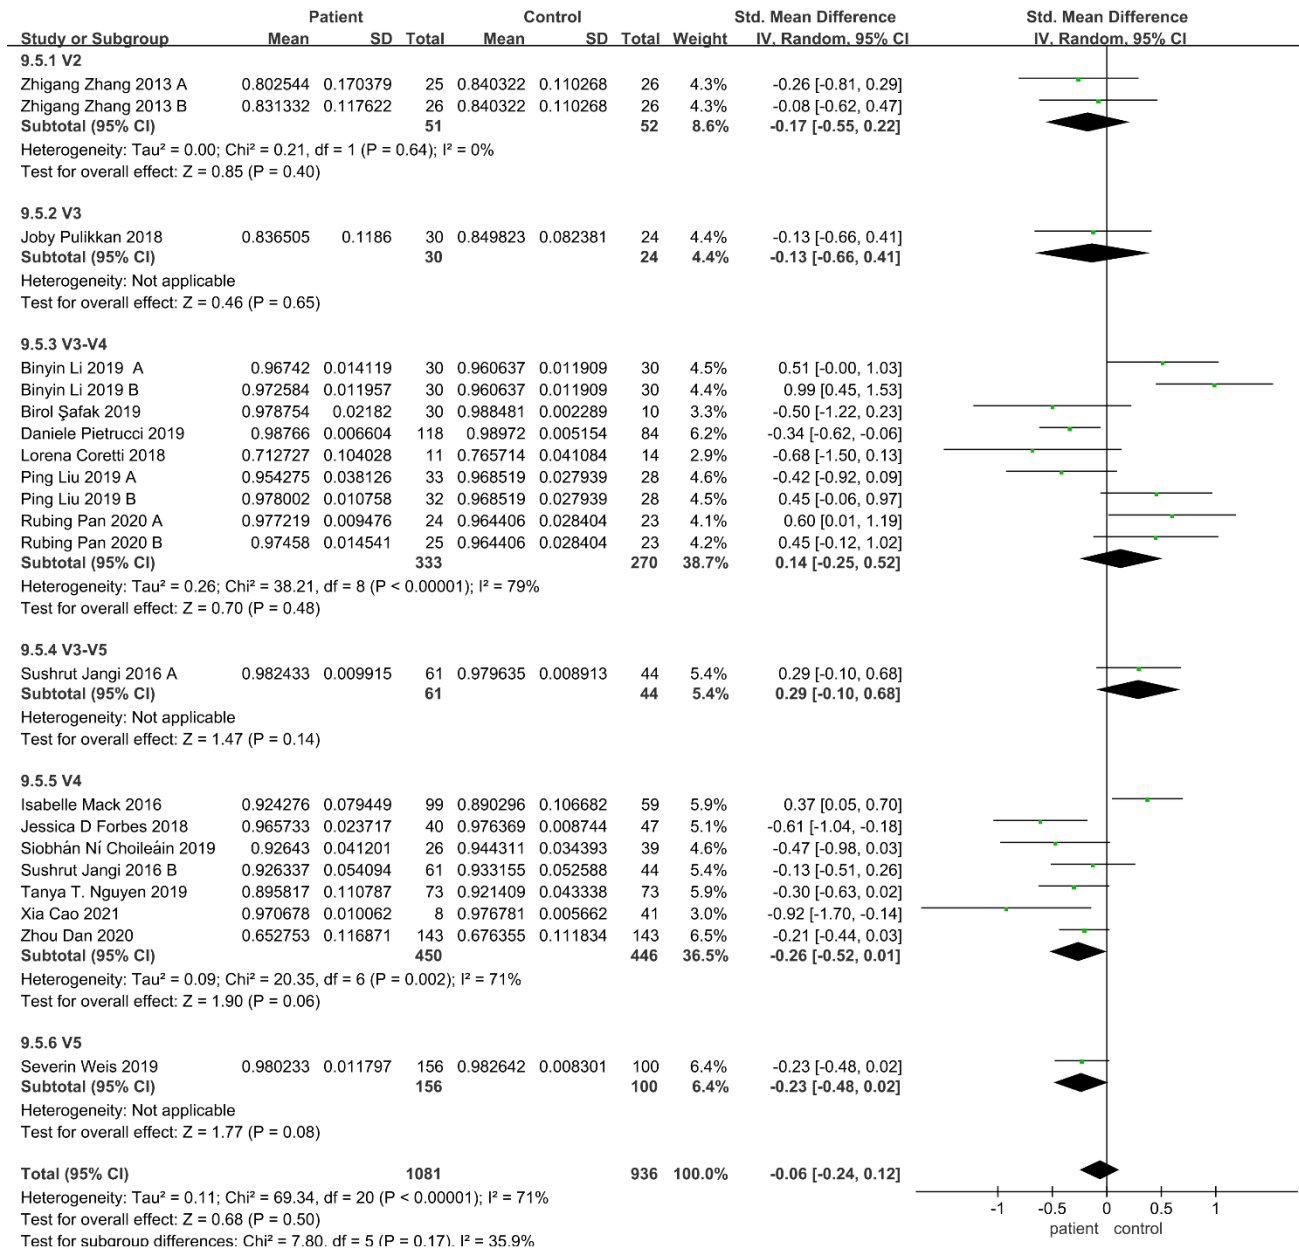

**Supplementary Figure 6. Forest plot of the Simpson for the sequencing region.** Abbreviations: SMD, standardized mean difference; SD, standard deviation.

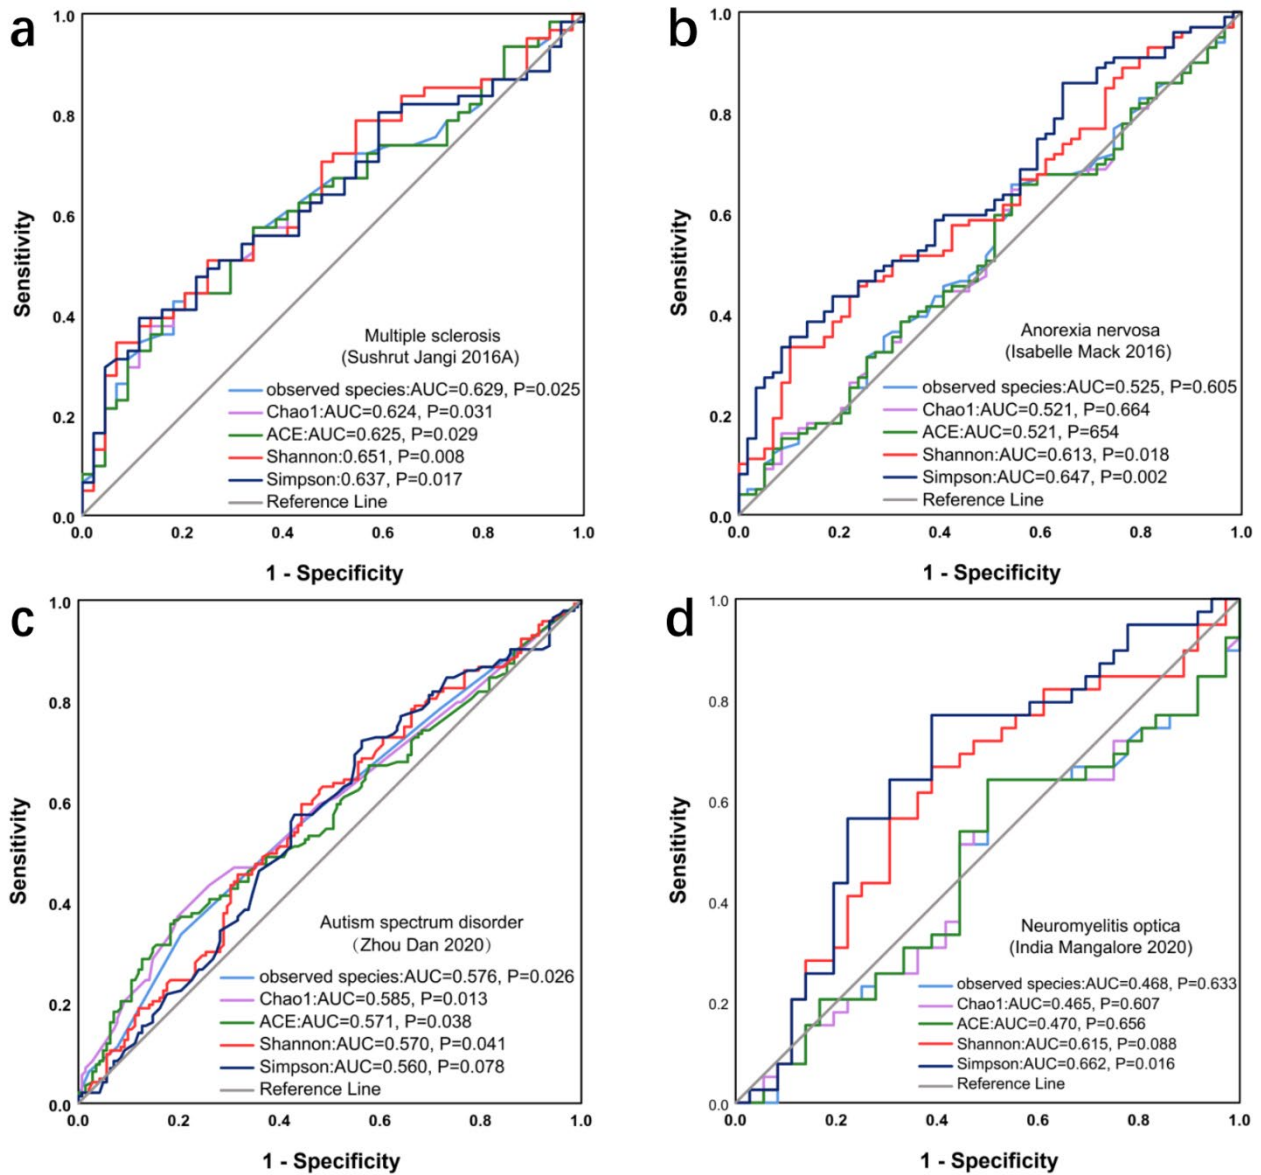

**Supplementary Figure 7. ROC curve analysis on neurological diseases.** ROC curve for Multiple sclerosis (a), Anorexia nervosa (b), Autism spectrum disorder (c) and Neuromyelitis optica (d). Abbreviations: ROC, receiver operating characteristic; AUC, area under the curve.
